# Supplementary material for: Dietary Oligofructose Alone or in Combination with 2′-Fucosyllactose Differentially Improves Recognition Memory and Hippocampal mRNA Expression
Source: PubMed Central journal article supplement (PMC7400822; doi:10.3390/nu12072131), 2020-07-17
Supplement: nutrients-12-02131-s001.pdf [file nutrients-12-02131-s001.pdf]

# Dietary oligofructose alone or in combination with 2'fucosyllactose differentially improves recognition memory and alters brain structure and hippocampal mRNA expression

Stephen A. Fleming<sup>1,2</sup>, Austin T. Mudd<sup>1,2</sup>, Jonas Hauser<sup>3</sup>, Jian Yan<sup>4</sup>, Sylviane Metairon<sup>3</sup>, Pascal Steiner<sup>3</sup>, Sharon M. Donovan<sup>5,6</sup>, Ryan N. Dilger<sup>1,2,5,6\*</sup>

<sup>1</sup>Piglet Nutrition and Cognition Laboratory, Department of Animal Sciences, University of Illinois, Urbana, IL, USA

<sup>2</sup>Neuroscience Program, University of Illinois, Urbana, Illinois, USA

<sup>3</sup>Nestlé Research, Lausanne, Switzerland

<sup>4</sup>Nestlé Product Technology Center Nutrition, Vevey, Switzerland

<sup>5</sup>Department of Food Science and Human Nutrition, University of Illinois, Urbana, IL, USA

<sup>6</sup>Division of Nutritional Sciences, University of Illinois, Urbana, Illinois, USA

\*Correspondence:

Dr. Ryan N. Dilger

University of Illinois

Department of Animal Sciences

Piglet Nutrition and Cognition Laboratory

1207 W. Gregory Street

186 Animal Sciences Laboratory

Urbana, IL, 61801, USA

(217) 333-2006

[rdilger2@illinois.edu](mailto:rdilger2@illinois.edu)

**Supplemental Table 1.** Exploratory behavior during the novel object recognition task<sup>1,2</sup>

| Measure                                  | Diet |        |    |        |           |        | Pooled SEM | P-value <sup>3</sup> |
|------------------------------------------|------|--------|----|--------|-----------|--------|------------|----------------------|
|                                          | CON  |        | OF |        | OF + 2'FL |        |            |                      |
|                                          | N    | Mean   | N  | Mean   | N         | Mean   |            |                      |
| Habituation 1                            |      |        |    |        |           |        |            |                      |
| Total distance moved, m                  | 12   | 119.48 | 12 | 104.13 | 12        | 102.27 | 8.99       | 0.208                |
| Δ distance moved, m/min                  | 12   | 2.04   | 12 | 0.88   | 12        | 1.47   | 0.35       | 0.084                |
| Time spent in the center of the arena, % | 12   | 32.91  | 12 | 33.02  | 12        | 32.62  | 2.66       | 0.991                |
| Habituation 2                            |      |        |    |        |           |        |            |                      |
| Total distance moved, m                  | 12   | 81.12  | 12 | 80.98  | 11        | 81.71  | 10.15      | 0.998                |
| Δ distance moved, m/min                  | 12   | 0.30   | 12 | 0.50   | 11        | 0.19   | 0.26       | 0.572                |
| Time spent in the center of the arena, % | 12   | 42.37  | 12 | 31.31  | 11        | 38.99  | 4.66       | 0.138                |
| Sample Phase                             |      |        |    |        |           |        |            |                      |
| Total object visit time, s               | 12   | 77.52  | 12 | 82.94  | 12        | 88.10  | 15.51      | 0.889                |
| Number of object visits                  | 12   | 11.88  | 12 | 13.50  | 12        | 12.38  | 1.65       | 0.751                |
| Mean object visit time, s                | 12   | 6.72   | 12 | 6.86   | 11        | 6.99   | 1.25       | 0.985                |
| Latency to first object visit, s         | 11   | 21.29  | 12 | 8.86   | 11        | 21.07  | 8.73       | 0.504                |
| Habituation towards both objects, s/min  | 12   | -3.42  | 12 | -5.11  | 11        | -3.69  | 1.21       | 0.550                |
| Total distance moved, m                  | 12   | 32.08  | 12 | 36.98  | 12        | 36.65  | 3.63       | 0.574                |
| Δ distance moved, m/min                  | 12   | 0.41   | 12 | 0.59   | 12        | 0.60   | 0.24       | 0.788                |
| Time spent in the center of the arena, % | 12   | 58.31  | 12 | 53.57  | 12        | 54.99  | 5.08       | 0.796                |
| Test Phase: 1-hour delay                 |      |        |    |        |           |        |            |                      |
| Novel object visit time, s               | 10   | 44.58  | 12 | 72.52  | 10        | 45.62  | 12.39      | 0.140                |
| Number of novel object visits            | 11   | 4.29   | 12 | 6.75   | 11        | 4.20   | 0.76       | 0.022                |
| Mean novel object visit time, s          | 11   | 11.86  | 12 | 11.73  | 11        | 8.20   | 2.50       | 0.501                |
| Latency to first novel object visit, s   | 9    | 27.78  | 12 | 13.96  | 11        | 55.01  | 15.46      | 0.108                |
| Habituation to the novel object, s/min   | 10   | -1.32  | 12 | -6.68  | 11        | -3.42  | 2.03       | 0.045                |
| Sample object visit time, s              | 10   | 39.90  | 12 | 32.81  | 10        | 39.65  | 12.14      | 0.872                |
| Number of sample object visits           | 11   | 5.59   | 12 | 5.75   | 12        | 5.75   | 0.94       | 0.989                |
| Mean sample object visit time, s         | 11   | 6.48   | 12 | 6.91   | 11        | 5.33   | 1.75       | 0.749                |
| Latency to first sample object visit, s  | 10   | 21.62  | 12 | 22.87  | 10        | 32.27  | 10.80      | 0.746                |
| Habituation to the sample object, s/min  | 10   | -2.25  | 12 | -1.52  | 10        | 0.70   | 0.91       | 0.038                |
| Total object visit time, s               | 11   | 83.64  | 12 | 105.33 | 12        | 111.93 | 23.23      | 0.642                |
| Number of object visits                  | 11   | 9.00   | 12 | 12.50  | 12        | 10.75  | 1.55       | 0.278                |
| Mean object visit time, s                | 11   | 8.38   | 12 | 9.43   | 11        | 7.64   | 2.15       | 0.811                |
| Latency to first object visit, s         | 11   | 13.09  | 12 | 7.57   | 11        | 29.86  | 9.84       | 0.258                |
| Habituation towards both objects, s/min  | 11   | -3.41  | 12 | -8.20  | 12        | -3.62  | 1.75       | 0.056                |
| Total distance moved, m                  | 11   | 29.49  | 11 | 28.95  | 12        | 32.32  | 3.41       | 0.745                |
| Δ distance moved, m/min                  | 11   | 0.16   | 12 | 0.29   | 12        | 0.23   | 0.27       | 0.937                |
| Time spent in the center of the arena, % | 11   | 61.17  | 12 | 61.34  | 12        | 60.95  | 6.03       | 0.999                |

<sup>1</sup>Abbreviations: CON, control group; OF, pigs fed oligofructose; OF + 2'FL, pigs fed oligofructose and 2'fucosyllactose; SEM, standard error of the mean; m, meter; Δ, change in; min, minute; %, percent; s, second.

<sup>2</sup>Data presented are least square means.

<sup>3</sup>P-values derived from mixed model ANOVA.

**Supplemental Table 1. Continued<sup>1,2</sup>**

| Measure                                  | Diet |       |    |       |           |       | Pooled<br>SEM | P-value <sup>3</sup> |
|------------------------------------------|------|-------|----|-------|-----------|-------|---------------|----------------------|
|                                          | CON  |       | OF |       | OF + 2'FL |       |               |                      |
|                                          | N    | Mean  | N  | Mean  | N         | Mean  |               |                      |
| Test Phase: 48-hour delay                |      |       |    |       |           |       |               |                      |
| Novel object visit time, s               | 10   | 37.16 | 12 | 46.94 | 11        | 68.87 | 10.67         | 0.107                |
| Number of novel object visits            | 11   | 5.18  | 12 | 6.08  | 12        | 8.08  | 0.90          | 0.073                |
| Mean novel object visit time, s          | 11   | 7.37  | 11 | 8.28  | 12        | 8.70  | 1.56          | 0.822                |
| Latency to first novel object visit, s   | 10   | 23.29 | 11 | 24.85 | 11        | 23.80 | 8.99          | 0.992                |
| Habituation to the novel object, s/min   | 10   | -2.55 | 12 | -1.91 | 11        | -3.96 | 1.25          | 0.465                |
| Sample object visit time, s              | 11   | 33.57 | 12 | 31.65 | 11        | 29.70 | 8.26          | 0.930                |
| Number of sample object visits           | 11   | 5.45  | 12 | 5.33  | 11        | 4.73  | 0.73          | 0.755                |
| Mean sample object visit time, s         | 11   | 5.91  | 12 | 5.70  | 12        | 5.71  | 1.15          | 0.984                |
| Latency to first sample object visit, s  | 11   | 42.44 | 12 | 34.47 | 11        | 46.74 | 16.14         | 0.856                |
| Habituation to the sample object, s/min  | 10   | 0.31  | 11 | -0.88 | 11        | -0.90 | 0.72          | 0.402                |
| Total object visit time, s               | 11   | 70.77 | 12 | 91.02 | 12        | 98.57 | 17.41         | 0.491                |
| Number of object visits                  | 11   | 9.75  | 12 | 11.42 | 12        | 12.42 | 1.44          | 0.427                |
| Mean object visit time, s                | 11   | 6.32  | 12 | 7.24  | 11        | 7.67  | 1.04          | 0.594                |
| Latency to first object visit, s         | 10   | 9.14  | 12 | 24.22 | 12        | 19.25 | 8.96          | 0.477                |
| Habituation towards both objects, s/min  | 10   | -2.24 | 12 | -1.94 | 11        | -4.86 | 1.48          | 0.289                |
| Total distance moved, m                  | 11   | 33.19 | 12 | 32.61 | 12        | 34.08 | 3.62          | 0.954                |
| Δ distance moved, m/min                  | 11   | -0.34 | 12 | 0.14  | 12        | 0.56  | 0.27          | 0.079                |
| Time spent in the center of the arena, % | 11   | 61.62 | 12 | 59.13 | 11        | 64.00 | 5.10          | 0.790                |

<sup>1</sup>Abbreviations: CON, control group; OF, pigs fed oligofructose; OF + 2'FL, pigs fed oligofructose and 2'fucosyllactose; SEM, standard error of the mean; s, second; m, meter; min, minute; %, percent; Δ, change in.

<sup>2</sup>Data presented are least square means.

<sup>3</sup>P-values derived from mixed model ANOVA.

**Supplemental Table 2.** Absolute Brain Volume<sup>1,2</sup>

| Brain Region, mm <sup>3</sup> | Diet |         |    |         |           |         | Pooled SEM | P-Value <sup>3</sup> |
|-------------------------------|------|---------|----|---------|-----------|---------|------------|----------------------|
|                               | CON  |         | OF |         | OF + 2'FL |         |            |                      |
|                               | N    | Mean    | N  | Mean    | N         | Mean    |            |                      |
| Caudate                       | 11   | 501.7   | 12 | 482.6   | 11        | 476.2   | 7.7        | 0.069                |
| Cerebellum                    | 11   | 6064.1  | 12 | 5983.1  | 11        | 6022.8  | 90.5       | 0.811                |
| Cerebral Aqueduct             | 11   | 46.6    | 12 | 47.0    | 11        | 46.8    | 1.7        | 0.991                |
| Corpus Callosum               | 11   | 364.4   | 12 | 363.4   | 11        | 362.7   | 7.8        | 0.976                |
| Cerebrospinal Fluid           | 11   | 5262.7  | 12 | 6163.4  | 11        | 6919.1  | 581.3      | 0.102                |
| Fourth Ventricle              | 10   | 48.8    | 12 | 48.4    | 11        | 51.2    | 1.6        | 0.322                |
| Grey Matter                   | 11   | 37999.0 | 12 | 37168.7 | 11        | 37141.8 | 533.1      | 0.429                |
| Hypothalamus                  | 11   | 249.7   | 12 | 240.4   | 11        | 242.4   | 3.4        | 0.135                |
| Internal Capsule              | 10   | 1491.7  | 12 | 1494.5  | 11        | 1543.5  | 26.1       | 0.097                |
| Lateral Ventricle             | 11   | 487.0   | 12 | 517.8   | 11        | 490.7   | 21.4       | 0.444                |
| Left Cortex                   | 11   | 16531.7 | 12 | 16488.2 | 11        | 16503.9 | 258.4      | 0.985                |
| Left Hippocampus              | 11   | 479.9   | 12 | 479.4   | 11        | 465.3   | 7.4        | 0.232                |
| Medulla                       | 11   | 1816.8  | 12 | 1815.0  | 11        | 1832.0  | 33.0       | 0.872                |
| Midbrain                      | 11   | 1869.8  | 12 | 1860.9  | 11        | 1875.6  | 27.9       | 0.918                |
| Olfactory Bulb                | 11   | 2238.0  | 12 | 2383.3  | 11        | 2391.8  | 57.5       | 0.051                |
| Pons                          | 11   | 1072.9  | 12 | 1073.1  | 11        | 1102.4  | 22.6       | 0.457                |
| Putamen-Globus Pallidus       | 11   | 412.0   | 12 | 403.3   | 11        | 401.1   | 7.4        | 0.379                |
| Right Cortex                  | 11   | 17065.1 | 12 | 17037.6 | 11        | 17177.4 | 258.9      | 0.835                |
| Right Hippocampus             | 11   | 491.7   | 12 | 489.0   | 11        | 477.0   | 7.1        | 0.220                |
| Thalamus                      | 11   | 1624.5  | 12 | 1571.7  | 11        | 1598.6  | 19.9       | 0.086                |
| Third Ventricle               | 11   | 47.6    | 12 | 48.7    | 11        | 50.7    | 2.3        | 0.634                |
| White Matter                  | 11   | 16926.4 | 12 | 17128.5 | 11        | 17338.6 | 395.0      | 0.616                |
| Whole Brain                   | 11   | 66353.8 | 12 | 65646.6 | 11        | 66239.5 | 1063.4     | 0.766                |

<sup>1</sup>Abbreviations: mm, millimeter; CON, control group; OF, pigs fed oligofructose; OF + 2'FL, pigs fed oligofructose and 2'fucosyllactose; SEM, standard error of the mean.

<sup>2</sup>Data presented are least square means.

<sup>3</sup>P-values derived from mixed model ANOVA.

**Supplemental Table 3.** Relative Brain Volume<sup>1,2</sup>

| Brain Region, %TBV      | Diet |        |    |        |           |        | Pooled SEM | P-Value <sup>3</sup> |
|-------------------------|------|--------|----|--------|-----------|--------|------------|----------------------|
|                         | CON  |        | OF |        | OF + 2'FL |        |            |                      |
|                         | N    | Mean   | N  | Mean   | N         | Mean   |            |                      |
| Caudate                 | 11   | 0.759  | 12 | 0.736  | 11        | 0.719  | 0.016      | 0.065                |
| Cerebellum              | 11   | 9.131  | 12 | 9.119  | 11        | 9.113  | 0.117      | 0.992                |
| Cerebral Aqueduct       | 11   | 0.070  | 12 | 0.072  | 11        | 0.071  | 0.002      | 0.906                |
| Corpus Callosum         | 11   | 0.550  | 12 | 0.554  | 11        | 0.548  | 0.013      | 0.869                |
| Cerebrospinal Fluid     | 11   | 7.911  | 12 | 9.351  | 11        | 10.459 | 0.806      | 0.090                |
| Fourth Ventricle        | 10   | 0.074  | 12 | 0.074  | 11        | 0.077  | 0.002      | 0.408                |
| Grey Matter             | 11   | 57.210 | 12 | 56.639 | 11        | 56.202 | 0.719      | 0.616                |
| Hypothalamus            | 11   | 0.376  | 12 | 0.367  | 11        | 0.367  | 0.006      | 0.337                |
| Internal Capsule        | 11   | 2.283  | 12 | 2.277  | 11        | 2.331  | 0.039      | 0.399                |
| Lateral Ventricle       | 11   | 0.736  | 12 | 0.790  | 11        | 0.742  | 0.036      | 0.364                |
| Left Cortex             | 11   | 24.929 | 12 | 25.114 | 11        | 24.929 | 0.228      | 0.752                |
| Left Hippocampus        | 11   | 0.723  | 12 | 0.731  | 11        | 0.704  | 0.010      | 0.063                |
| Medulla                 | 11   | 2.746  | 12 | 2.766  | 11        | 2.769  | 0.056      | 0.893                |
| Midbrain                | 11   | 2.817  | 12 | 2.836  | 11        | 2.837  | 0.038      | 0.902                |
| Olfactory Bulb          | 11   | 3.379  | 12 | 3.628  | 11        | 3.617  | 0.068      | 0.019                |
| Pons                    | 11   | 1.615  | 12 | 1.635  | 11        | 1.665  | 0.022      | 0.273                |
| Putamen-Globus Pallidus | 11   | 0.622  | 12 | 0.615  | 11        | 0.606  | 0.011      | 0.395                |
| Right Cortex            | 11   | 25.745 | 12 | 25.957 | 11        | 25.952 | 0.265      | 0.730                |
| Right Hippocampus       | 11   | 0.741  | 12 | 0.745  | 11        | 0.721  | 0.008      | 0.056                |
| Thalamus                | 11   | 2.450  | 12 | 2.397  | 11        | 2.417  | 0.035      | 0.219                |
| Third Ventricle         | 11   | 0.071  | 12 | 0.074  | 11        | 0.077  | 0.003      | 0.529                |
| White Matter            | 11   | 25.543 | 12 | 26.099 | 11        | 26.209 | 0.586      | 0.468                |

<sup>1</sup>Abbreviations: %TBV, percent total brain volume; CON, control group; OF, pigs fed oligofructose; OF + 2'FL, pigs fed oligofructose and 2'fucosyllactose; SEM, standard error of the mean.

<sup>2</sup>Data presented are least square means.

<sup>3</sup>P-values derived from mixed model ANOVA.

**Supplemental Table 4.** Diffusion Tensor Imaging<sup>1,2</sup>

| Measure, x10 <sup>-3</sup> mm <sup>2</sup> /s | Diet |       |    |       |           |       | Pooled SEM | P-Value <sup>3</sup> |
|-----------------------------------------------|------|-------|----|-------|-----------|-------|------------|----------------------|
|                                               | CON  |       | OF |       | OF + 2'FL |       |            |                      |
|                                               | N    | Mean  | N  | Mean  | N         | Mean  |            |                      |
| Axial diffusivity                             |      |       |    |       |           |       |            |                      |
| Caudate                                       | 11   | 1.188 | 10 | 1.219 | 10        | 1.237 | 0.019      | 0.193                |
| Corpus Callosum                               | 11   | 1.614 | 11 | 1.665 | 10        | 1.681 | 0.066      | 0.713                |
| Cerebellum                                    | 11   | 1.347 | 11 | 1.345 | 10        | 1.392 | 0.029      | 0.424                |
| Left Hippocampus                              | 11   | 1.517 | 10 | 1.448 | 10        | 1.479 | 0.037      | 0.359                |
| Right Hippocampus                             | 11   | 1.499 | 11 | 1.489 | 10        | 1.505 | 0.050      | 0.971                |
| Internal Capsule                              | 11   | 1.276 | 11 | 1.275 | 10        | 1.282 | 0.009      | 0.751                |
| Left Cortex                                   | 11   | 1.364 | 11 | 1.361 | 10        | 1.352 | 0.010      | 0.591                |
| Right Cortex                                  | 11   | 1.403 | 11 | 1.407 | 10        | 1.418 | 0.016      | 0.795                |
| Thalamus                                      | 11   | 1.177 | 11 | 1.178 | 10        | 1.169 | 0.014      | 0.788                |
| DTI-derived white matter                      | 11   | 1.406 | 11 | 1.403 | 10        | 1.400 | 0.012      | 0.903                |
| Atlas-derived white matter                    | 11   | 1.459 | 11 | 1.447 | 10        | 1.450 | 0.016      | 0.727                |
| Radial diffusivity                            |      |       |    |       |           |       |            |                      |
| Caudate                                       | 11   | 0.706 | 10 | 0.731 | 10        | 0.736 | 0.012      | 0.187                |
| Corpus Callosum                               | 11   | 1.020 | 11 | 1.057 | 10        | 1.076 | 0.042      | 0.590                |
| Cerebellum                                    | 11   | 1.054 | 11 | 1.045 | 10        | 1.088 | 0.026      | 0.470                |
| Left Hippocampus                              | 10   | 0.945 | 11 | 0.920 | 10        | 0.926 | 0.036      | 0.809                |
| Right Hippocampus                             | 11   | 0.940 | 11 | 0.934 | 10        | 0.965 | 0.037      | 0.818                |
| Internal Capsule                              | 10   | 0.659 | 11 | 0.654 | 10        | 0.647 | 0.005      | 0.207                |
| Left Cortex                                   | 11   | 0.850 | 11 | 0.843 | 10        | 0.839 | 0.008      | 0.584                |
| Right Cortex                                  | 11   | 0.861 | 11 | 0.863 | 10        | 0.866 | 0.012      | 0.939                |
| Thalamus                                      | 11   | 0.720 | 11 | 0.720 | 10        | 0.732 | 0.008      | 0.225                |
| DTI-derived white matter                      | 11   | 0.879 | 11 | 0.872 | 10        | 0.872 | 0.008      | 0.769                |
| Atlas-derived white matter                    | 11   | 0.911 | 11 | 0.901 | 10        | 0.904 | 0.011      | 0.643                |
| Mean diffusivity                              |      |       |    |       |           |       |            |                      |
| Caudate                                       | 11   | 0.867 | 10 | 0.893 | 10        | 0.903 | 0.014      | 0.165                |
| Corpus Callosum                               | 11   | 1.217 | 11 | 1.260 | 10        | 1.278 | 0.050      | 0.642                |
| Cerebellum                                    | 11   | 1.152 | 11 | 1.145 | 10        | 1.190 | 0.027      | 0.452                |
| Left Hippocampus                              | 10   | 1.134 | 10 | 1.078 | 10        | 1.111 | 0.031      | 0.364                |
| Right Hippocampus                             | 11   | 1.127 | 11 | 1.119 | 10        | 1.145 | 0.041      | 0.895                |
| Internal Capsule                              | 10   | 0.866 | 11 | 0.861 | 10        | 0.859 | 0.005      | 0.521                |
| Left Cortex                                   | 11   | 1.021 | 11 | 1.016 | 10        | 1.010 | 0.009      | 0.581                |
| Right Cortex                                  | 11   | 1.042 | 11 | 1.044 | 10        | 1.050 | 0.013      | 0.882                |
| Thalamus                                      | 10   | 0.875 | 11 | 0.873 | 10        | 0.878 | 0.009      | 0.778                |
| DTI-derived white matter                      | 11   | 1.055 | 11 | 1.049 | 10        | 1.048 | 0.009      | 0.820                |
| Atlas-derived white matter                    | 11   | 1.093 | 11 | 1.083 | 10        | 1.086 | 0.012      | 0.676                |

<sup>1</sup>Abbreviations: mm, millimeter; s, second; CON, control group; OF, pigs fed oligofructose; OF + 2'FL, pigs fed oligofructose and 2' fucosyllactose; SEM, standard error of the mean; DTI, diffusion tensor imaging.

<sup>2</sup>Data presented are least square means.

<sup>3</sup>P-values derived from mixed model ANOVA.

**Supplemental Table 5.** Fractional Anisotropy<sup>1,2</sup>

| Brain Region, arbitrary units | Diet |       |    |       |           |       | Pooled SEM | P-Value <sup>3</sup> |
|-------------------------------|------|-------|----|-------|-----------|-------|------------|----------------------|
|                               | CON  |       | OF |       | OF + 2'FL |       |            |                      |
|                               | N    | Mean  | N  | Mean  | N         | Mean  |            |                      |
| Caudate                       | 10   | 0.339 | 11 | 0.330 | 10        | 0.333 | 0.005      | 0.387                |
| Corpus Callosum               | 11   | 0.296 | 11 | 0.293 | 10        | 0.291 | 0.005      | 0.709                |
| Cerebellum                    | 10   | 0.167 | 11 | 0.168 | 10        | 0.169 | 0.004      | 0.940                |
| Left Hippocampus              | 9    | 0.301 | 11 | 0.308 | 10        | 0.301 | 0.006      | 0.492                |
| Right Hippocampus             | 11   | 0.297 | 11 | 0.297 | 10        | 0.285 | 0.006      | 0.336                |
| Internal Capsule              | 10   | 0.409 | 11 | 0.412 | 10        | 0.420 | 0.004      | 0.173                |
| Left Cortex                   | 10   | 0.315 | 11 | 0.316 | 10        | 0.315 | 0.001      | 0.801                |
| Right Cortex                  | 10   | 0.329 | 11 | 0.324 | 10        | 0.328 | 0.002      | 0.259                |
| Thalamus                      | 11   | 0.313 | 11 | 0.320 | 10        | 0.306 | 0.006      | 0.245                |
| DTI-derived white matter      | 10   | 0.314 | 11 | 0.315 | 10        | 0.314 | 0.001      | 0.952                |
| Atlas-derived white matter    | 11   | 0.314 | 11 | 0.315 | 10        | 0.315 | 0.002      | 0.494                |

<sup>1</sup>Abbreviations: CON, control group; OF, pigs fed oligofructose; OF + 2'FL, pigs fed oligofructose and 2'fucosyllactose; SEM, standard error of the mean; DTI, diffusion tensor imaging.

<sup>2</sup>Data presented are least square means.

<sup>3</sup>P-values derived from mixed model ANOVA.

**Supplemental Table 6.** Magnetic Resonance Spectroscopy<sup>1,2</sup>

| Metabolite, ppm              | Diet |       |    |       |           |       | Pooled SEM | P-Value <sup>3</sup> |
|------------------------------|------|-------|----|-------|-----------|-------|------------|----------------------|
|                              | CON  |       | OF |       | OF + 2'FL |       |            |                      |
|                              | N    | Mean  | N  | Mean  | N         | Mean  |            |                      |
| Glutathione                  | 9    | 1.080 | 9  | 1.148 | 12        | 1.286 | 0.102      | 0.303                |
| Myo-inositol                 | 10   | 4.231 | 10 | 4.618 | 12        | 4.438 | 0.282      | 0.536                |
| N-acetylaspartate            | 10   | 4.250 | 10 | 4.224 | 12        | 4.120 | 0.176      | 0.836                |
| $\gamma$ -amino butyric acid | 11   | 1.396 | 10 | 1.393 | 12        | 1.366 | 0.064      | 0.893                |

<sup>1</sup>Abbreviations: ppm, parts per million; CON, control group; OF, pigs fed oligofructose; OF + 2'FL, pigs fed oligofructose and 2'fucosyllactose; SEM, standard error of the mean; SEM, standard error of the mean.

<sup>2</sup>Data presented are least square means.

<sup>3</sup>P-values derived from mixed model ANOVA.



**Supplemental Table 7. Gene Expression<sup>1</sup>**

| Measure <sup>3</sup>      | Diet |                |    |                    |           |                    | Pooled SEM | P-Value <sup>2</sup> | Accession Number |
|---------------------------|------|----------------|----|--------------------|-----------|--------------------|------------|----------------------|------------------|
|                           | CON  |                | OF |                    | OF + 2'FL |                    |            |                      |                  |
|                           | N    | Mean           | N  | Mean               | N         | Mean               |            |                      |                  |
| <i>5HTR1</i>              | 12   | 0              | 12 | -0.61              | 12        | -0.79              | 0.29       | 0.115                | XM_005672476.2   |
| <i>5HTR2</i>              | 12   | 0              | 12 | 0.18               | 12        | 0.18               | 0.30       | 0.888                | XM_013980517.1   |
| <i>5HTR3<sup>5</sup></i>  | 12   | 0              | 12 | -0.76              | 12        | 0.09               | 0.28       | 0.070                | XM_003357301.3   |
| <i>5HTR4</i>              | 12   | 0              | 12 | 0.15               | 12        | 0.12               | 0.32       | 0.919                | NM_001001267.1   |
| <i>5HTR6</i>              | 12   | 0              | 12 | -0.05              | 12        | 0.26               | 0.30       | 0.732                | XM_003356173.3   |
| <i>5HTR7</i>              | 12   | 0              | 12 | -0.13              | 11        | 0.15               | 0.31       | 0.809                | NM_214085.1      |
| <i>BDNF</i>               | 12   | 0              | 11 | -0.37              | 12        | 0.04               | 0.34       | 0.505                | XM_005654684.2   |
| <i>C-FOS</i>              | 12   | 0              | 12 | -0.64              | 12        | -0.71              | 0.35       | 0.065                | NM_001123113.1   |
| <i>CHRM1</i>              | 12   | 0              | 12 | -0.17              | 12        | -0.05              | 0.38       | 0.836                | NM_214034.1      |
| <i>CHRM2<sup>4</sup></i>  | 12   | 0 <sup>a</sup> | 12 | -0.75 <sup>a</sup> | 12        | -0.77 <sup>a</sup> | 0.32       | 0.045                | NM_214261.1      |
| <i>CHRM3</i>              | 12   | 0              | 12 | -0.86              | 12        | -0.29              | 0.28       | 0.099                | NM_001123098.1   |
| <i>CHRM4<sup>5</sup></i>  | 12   | 0              | 12 | -0.41              | 12        | -0.92              | 0.32       | 0.054                | XM_003122828.4   |
| <i>CHRM5</i>              | 11   | 0              | 12 | 0.00               | 12        | -0.35              | 0.32       | 0.569                | XM_013997263.1   |
| <i>CHRNA2</i>             | 12   | 0              | 12 | -0.39              | 12        | -0.79              | 0.31       | 0.108                | XM_003132824.3   |
| <i>CHRNA3<sup>5</sup></i> | 12   | 0              | 12 | 0.03               | 11        | 0.71               | 0.29       | 0.152                | XM_013988980.1   |
| <i>CHRNA7</i>             | 12   | 0              | 12 | -0.47              | 12        | -0.22              | 0.32       | 0.472                | XM_013993241.1   |
| <i>CHRN2<sup>5</sup></i>  | 12   | 0              | 12 | 0.54               | 12        | 0.91               | 0.29       | 0.090                | XM_003125722.3   |
| <i>CHRN4</i>              | 12   | 0              | 12 | 0.28               | 12        | 0.49               | 0.31       | 0.497                | XM_013988981.1   |
| <i>CREB</i>               | 12   | 0              | 12 | -0.58              | 11        | 0.13               | 0.28       | 0.184                | NM_001099929.1   |
| <i>CREBBP</i>             | 12   | 0              | 12 | -0.41              | 12        | 0.25               | 0.29       | 0.268                | XM_003354647.4   |
| <i>DLG4</i>               | 12   | 0              | 12 | -0.44              | 12        | 0.00               | 0.34       | 0.402                | XR_001303340.1   |
| <i>DRD1<sup>5</sup></i>   | 12   | 0              | 12 | 0.21               | 12        | -0.22              | 0.29       | 0.590                | XM_005672535.2   |

<sup>1</sup>Abbreviations: CON, control group; OF, pigs fed oligofructose; OF + 2'FL, pigs fed oligofructose and 2'fucosyllactose; SEM, standard error of the mean.

<sup>2</sup>Data analyzed via two-way ANOVA with post-hoc Tukey adjustment for multiple comparisons.

<sup>3</sup>Standardized values for mRNA expression (mean = 0, standard deviation = 1) centered by control group.

<sup>4</sup>Mean separation insignificant after Tukey adjustment.

<sup>5</sup>Number of samples below threshold (median of negative controls): *5HTR3*, 9; *CHRM4*, 5; *CHRNA3*, 1; *CHRN2*, 1; *DRD1*, 1; *DRD2*, 3; *DRD4*, 18; *GABBR2*, 1; *GLRA4*, 9; *GRIN2C*, 2; *SLC18A2*, 8; *SLC6A2*, 15; *SLC6A3*, 14; *SLC6A4*, 4.

<sup>abc</sup>Means without a common superscript differ ( $P < 0.05$ ).

Supplemental Table 7. Continued<sup>1</sup>

| Measure <sup>3</sup>       | Diet |                 |    |                    |           |                   | Pooled SEM | P-Value <sup>2</sup> | Accession Number |
|----------------------------|------|-----------------|----|--------------------|-----------|-------------------|------------|----------------------|------------------|
|                            | CON  |                 | OF |                    | OF + 2'FL |                   |            |                      |                  |
|                            | N    | Mean            | N  | Mean               | N         | Mean              |            |                      |                  |
| <i>DRD2</i> <sup>5</sup>   | 12   | 0               | 12 | -0.46              | 12        | -0.62             | 0.29       | 0.291                | XM_005667325.2   |
| <i>DRD3</i>                | 12   | 0 <sup>ab</sup> | 12 | -0.47 <sup>b</sup> | 12        | 0.67 <sup>a</sup> | 0.26       | 0.016                | XM_013982425.1   |
| <i>DRD4</i> <sup>5</sup>   | 12   | 0               | 12 | -0.22              | 12        | -0.59             | 0.31       | 0.343                | XM_003122390.2   |
| <i>DRD5</i>                | 12   | 0               | 12 | -0.46              | 12        | 0.01              | 0.29       | 0.425                | XM_013989284.1   |
| <i>EGR1</i>                | 12   | 0               | 12 | -0.59              | 11        | -0.23             | 0.34       | 0.251                | XM_003123974.5   |
| <i>GABBR1</i>              | 12   | 0 <sup>ab</sup> | 12 | -0.52 <sup>b</sup> | 12        | 0.42 <sup>a</sup> | 0.32       | 0.037                | NM_001123114.1   |
| <i>GABBR2</i> <sup>5</sup> | 12   | 0               | 12 | 0.07               | 12        | 0.32              | 0.29       | 0.722                | XM_003122032.5   |
| <i>GABRA1</i>              | 12   | 0               | 12 | -0.39              | 12        | -0.65             | 0.29       | 0.283                | XM_013984876.1   |
| <i>GABRA2</i>              | 12   | 0               | 12 | -0.34              | 12        | -0.22             | 0.30       | 0.706                | XM_013978645.1   |
| <i>GABRA5</i>              | 12   | 0               | 12 | -0.21              | 12        | -0.10             | 0.34       | 0.845                | XM_005654471.2   |
| <i>GABRB2</i>              | 12   | 0               | 12 | -0.22              | 12        | -0.61             | 0.31       | 0.276                | XM_013984878.1   |
| <i>GABRD</i>               | 12   | 0               | 12 | 0.11               | 12        | 0.03              | 0.35       | 0.951                | XM_013988717.1   |
| <i>GABRG2</i>              | 12   | 0               | 12 | -0.29              | 12        | -0.47             | 0.33       | 0.450                | XM_003359825.3   |
| <i>GABRR1</i>              | 12   | 0               | 12 | -0.44              | 12        | -0.71             | 0.28       | 0.218                | XM_013992686.1   |
| <i>GAD</i>                 | 12   | 0               | 12 | -0.60              | 12        | 0.02              | 0.28       | 0.233                | NM_213894.1      |
| <i>GLRA1</i>               | 12   | 0               | 12 | -0.37              | 12        | 0.21              | 0.29       | 0.365                | XM_013984909.1   |
| <i>GLRA2</i>               | 12   | 0               | 11 | -0.40              | 12        | -0.23             | 0.29       | 0.637                | XM_013985912.1   |
| <i>GLRA3</i>               | 12   | 0               | 12 | -0.02              | 11        | 0.16              | 0.31       | 0.889                | XM_003132832.5   |
| <i>GLRA4</i> <sup>5</sup>  | 12   | 0               | 12 | -0.61              | 12        | -0.50             | 0.31       | 0.266                | XM_003135271.3   |
| <i>GRIA1</i>               | 12   | 0               | 12 | -0.36              | 12        | -0.14             | 0.30       | 0.689                | XM_003359841.4   |
| <i>GRIA2</i>               | 12   | 0               | 12 | -0.67              | 12        | -0.29             | 0.32       | 0.222                | XM_005656504.2   |
| <i>GRIA3</i>               | 12   | 0               | 12 | -0.44              | 12        | -0.67             | 0.30       | 0.232                | XM_003135356.4   |

<sup>1</sup>Abbreviations: CON, control group; OF, pigs fed oligofructose; OF + 2'FL, pigs fed oligofructose and 2'fucosyllactose; SEM, standard error of the mean.

<sup>2</sup>Data analyzed via two-way ANOVA with post-hoc Tukey adjustment for multiple comparisons.

<sup>3</sup>Standardized values for mRNA expression (mean = 0, standard deviation = 1) centered by control group.

<sup>4</sup>Mean separation insignificant after Tukey adjustment.

<sup>5</sup>Number of samples below threshold: *5HTR3*, 9; *CHRM4*, 5; *CHRNA3*, 1; *CHRN2*, 1; *DRD1*, 1; *DRD2*, 3; *DRD4*, 18; *GABBR2*, 1; *GLRA4*, 9; *GRIN2C*, 2; *SLC18A2*, 8; *SLC6A2*, 15; *SLC6A3*, 14; *SLC6A4*, 4.

<sup>abc</sup>Means without a common superscript differ ( $P < 0.05$ ).

Supplemental Table 7. Continued<sup>1</sup>

| Measure <sup>3</sup>       | Diet |                 |    |                    |           |                    | Pooled SEM | P-Value <sup>2</sup> | Accession Number |
|----------------------------|------|-----------------|----|--------------------|-----------|--------------------|------------|----------------------|------------------|
|                            | CON  |                 | OF |                    | OF + 2'FL |                    |            |                      |                  |
|                            | N    | Mean            | N  | Mean               | N         | Mean               |            |                      |                  |
| <i>GRIA4</i>               | 12   | 0               | 12 | -0.36              | 11        | -0.10              | 0.29       | 0.668                | XM_013979342.1   |
| <i>GRIN1</i>               | 12   | 0               | 12 | 0.00               | 12        | -0.05              | 0.38       | 0.975                | XM_013992346.1   |
| <i>GRIN2A</i>              | 12   | 0               | 12 | -0.28              | 11        | -0.14              | 0.33       | 0.746                | XM_003481048.3   |
| <i>GRIN2B</i>              | 12   | 0               | 12 | -0.61              | 11        | -0.17              | 0.32       | 0.267                | XM_003355567.3   |
| <i>GRIN2C</i> <sup>5</sup> | 12   | 0               | 12 | -0.71              | 12        | -0.02              | 0.28       | 0.141                | XM_013980765.1   |
| <i>GRIN2D</i>              | 11   | 0               | 12 | -0.81              | 12        | -0.55              | 0.31       | 0.087                | XM_003127274.4   |
| <i>HDAC1</i>               | 11   | 0               | 12 | -0.43              | 12        | 0.53               | 0.27       | 0.061                | XM_013999116.1   |
| <i>HDAC2</i>               | 12   | 0               | 12 | -0.30              | 11        | -0.30              | 0.33       | 0.645                | XM_001925318.5   |
| <i>HDAC3</i>               | 12   | 0               | 12 | -0.80              | 12        | -0.30              | 0.28       | 0.143                | XM_013995254.1   |
| <i>HDAC4</i>               | 12   | 0               | 12 | -0.86              | 11        | -0.48              | 0.28       | 0.107                | XM_005657593.2   |
| <i>HDAC5</i>               | 11   | 0 <sup>ab</sup> | 12 | -0.45 <sup>b</sup> | 12        | 0.62 <sup>a</sup>  | 0.30       | 0.012                | XM_013980921.1   |
| <i>HDAC7</i>               | 12   | 0               | 12 | -0.34              | 11        | 0.05               | 0.29       | 0.606                | XM_013988449.1   |
| <i>HDAC8</i>               | 12   | 0 <sup>a</sup>  | 12 | -1.27 <sup>b</sup> | 12        | -0.35 <sup>a</sup> | 0.25       | 0.003                | XM_013990927.1   |
| <i>HDAC9</i>               | 12   | 0               | 12 | -0.35              | 12        | -0.22              | 0.32       | 0.658                | XM_013979765.1   |
| <i>IGF1</i>                | 12   | 0               | 12 | -0.42              | 12        | -0.82              | 0.28       | 0.131                | NM_214256.1      |
| <i>IGF2</i>                | 12   | 0               | 12 | -0.86              | 12        | -0.70              | 0.29       | 0.084                | NM_213883.2      |
| <i>MAG</i>                 | 12   | 0               | 12 | 0.39               | 11        | 0.64               | 0.30       | 0.316                | XM_013998313.1   |
| <i>MBP</i>                 | 12   | 0               | 12 | 0.35               | 12        | 0.65               | 0.30       | 0.305                | NM_001001546.2   |
| <i>NCAM1</i>               | 12   | 0 <sup>ab</sup> | 12 | -0.74 <sup>b</sup> | 12        | 0.35 <sup>a</sup>  | 0.29       | 0.011                | XM_005667343.2   |
| <i>NPY</i>                 | 12   | 0               | 12 | -0.16              | 12        | 0.43               | 0.30       | 0.360                | NM_001256367.1   |
| <i>NR3C1</i>               | 12   | 0               | 12 | -0.30              | 12        | 0.51               | 0.30       | 0.137                | NM_001008481.1   |
| <i>NR3C2</i>               | 12   | 0               | 12 | -0.25              | 12        | -0.34              | 0.31       | 0.674                | XM_013978843.1   |
| <i>NR4A1</i>               | 12   | 0               | 12 | -0.06              | 11        | 0.01               | 0.32       | 0.985                | FJ548761.1       |

<sup>1</sup>Abbreviations: CON, control group; OF, pigs fed oligofructose; OF + 2'FL, pigs fed oligofructose and 2'fucosyllactose; SEM, standard error of the mean.

<sup>2</sup>Data analyzed via two-way ANOVA with post-hoc Tukey adjustment for multiple comparisons.

<sup>3</sup>Standardized values for mRNA expression (mean = 0, standard deviation = 1) centered by control group.

<sup>4</sup>Mean separation insignificant after Tukey adjustment.

<sup>5</sup>Number of samples below threshold: *5HTR3*, 9; *CHRM4*, 5; *CHRNA3*, 1; *CHRN2*, 1; *DRD1*, 1; *DRD2*, 3; *DRD4*, 18; *GABBR2*, 1; *GLRA4*, 9; *GRIN2C*, 2; *SLC18A2*, 8; *SLC6A2*, 15; *SLC6A3*, 14; *SLC6A4*, 4.

<sup>abc</sup>Means without a common superscript differ ( $P < 0.05$ ).

Supplemental Table 7. Continued<sup>1</sup>

| Measure <sup>3</sup>        | Diet |      |    |       |           |       | Pooled SEM | P-Value <sup>2</sup> | Accession Number |
|-----------------------------|------|------|----|-------|-----------|-------|------------|----------------------|------------------|
|                             | CON  |      | OF |       | OF + 2'FL |       |            |                      |                  |
|                             | N    | Mean | N  | Mean  | N         | Mean  |            |                      |                  |
| <i>NR4A2</i>                | 11   | 0    | 11 | -0.36 | 12        | -0.41 | 0.31       | 0.580                | NM_001190276.1   |
| <i>PLP</i>                  | 12   | 0    | 12 | 0.23  | 11        | 0.64  | 0.30       | 0.314                | NM_213974.1      |
| <i>PP1AC</i>                | 12   | 0    | 12 | -0.47 | 12        | 0.31  | 0.29       | 0.141                | NM_001044559.1   |
| <i>SIRT1</i>                | 11   | 0    | 11 | -0.41 | 12        | 0.19  | 0.30       | 0.358                | NM_001145750.1   |
| <i>SLC17A6</i>              | 12   | 0    | 12 | -0.46 | 12        | -0.41 | 0.31       | 0.483                | XM_003122911.4   |
| <i>SLC17A7</i>              | 12   | 0    | 12 | 0.13  | 12        | 0.36  | 0.38       | 0.492                | XM_003127311.3   |
| <i>SLC17A8</i>              | 12   | 0    | 12 | -0.31 | 12        | 0.54  | 0.28       | 0.109                | XM_003126690.5   |
| <i>SLC18A1</i>              | 12   | 0    | 12 | -0.75 | 11        | -0.46 | 0.29       | 0.165                | XM_013990243.1   |
| <i>SLC18A2</i> <sup>5</sup> | 12   | 0    | 12 | -0.78 | 12        | -0.36 | 0.29       | 0.180                | NM_001315654.1   |
| <i>SLC18A3</i>              | 12   | 0    | 12 | 0.59  | 12        | 0.72  | 0.28       | 0.179                | XM_013983446.1   |
| <i>SLC1A1</i>               | 12   | 0    | 12 | 0.11  | 12        | 0.42  | 0.29       | 0.579                | NM_001164649.1   |
| <i>SLC1A2</i>               | 12   | 0    | 12 | -0.18 | 12        | 0.24  | 0.33       | 0.574                | XM_003480708.3   |
| <i>SLC1A3</i>               | 12   | 0    | 12 | -0.13 | 11        | 0.08  | 0.30       | 0.883                | NM_001244425.2   |
| <i>SLC1A6</i>               | 11   | 0    | 11 | -0.21 | 12        | 0.18  | 0.31       | 0.613                | XM_003123429.4   |
| <i>SLC1A7</i>               | 12   | 0    | 12 | -0.52 | 11        | -0.23 | 0.30       | 0.440                | XM_013999377.1   |
| <i>SLC32A1</i>              | 11   | 0    | 11 | -0.41 | 12        | -0.28 | 0.30       | 0.599                | XM_003134437.4   |
| <i>SLC6A1</i>               | 12   | 0    | 12 | -0.17 | 12        | 0.02  | 0.30       | 0.884                | XM_005669778.2   |
| <i>SLC6A11</i>              | 12   | 0    | 12 | -0.66 | 12        | -0.10 | 0.30       | 0.223                | XM_005657080.1   |
| <i>SLC6A13</i>              | 12   | 0    | 12 | -0.97 | 12        | -0.51 | 0.29       | 0.074                | XM_003126576.4   |
| <i>SLC6A2</i> <sup>5</sup>  | 12   | 0    | 12 | -0.12 | 12        | -0.72 | 0.30       | 0.172                | XM_013994585.1   |
| <i>SLC6A3</i> <sup>5</sup>  | 12   | 0    | 12 | -0.25 | 12        | -0.28 | 0.32       | 0.763                | XM_005674638.2   |
| <i>SLC6A4</i> <sup>5</sup>  | 12   | 0    | 12 | -0.32 | 11        | -0.06 | 0.34       | 0.679                | XM_013981192.1   |
| <i>SNAP25</i>               | 12   | 0    | 12 | -0.62 | 12        | -0.35 | 0.30       | 0.326                | XM_003359900.3   |

<sup>1</sup>Abbreviations: CON, control group; OF, pigs fed oligofructose; OF + 2'FL, pigs fed oligofructose and 2'fucosyllactose; SEM, standard error of the mean.

<sup>2</sup>Data analyzed via two-way ANOVA with post-hoc Tukey adjustment for multiple comparisons.

<sup>3</sup>Standardized values for mRNA expression (mean = 0, standard deviation = 1) centered by control group.

<sup>4</sup>Mean separation insignificant after Tukey adjustment.

<sup>5</sup>Number of samples below threshold: *5HTR3*, 9; *CHRM4*, 5; *CHRNA3*, 1; *CHRN2*, 1; *DRD1*, 1; *DRD2*, 3; *DRD4*, 18; *GABBR2*, 1; *GLRA4*, 9; *GRIN2C*, 2; *SLC18A2*, 8; *SLC6A2*, 15; *SLC6A3*, 14; *SLC6A4*, 4.

<sup>abc</sup>Means without a common superscript differ ( $P < 0.05$ ).

**Supplemental Table 7. Continued<sup>1</sup>**

| <b>Measure<sup>3</sup></b> | <b>Diet</b> |             |           |             |                  |             | <b>Pooled SEM</b> | <b>P-Value<sup>2</sup></b> | <b>Accession Number</b> |
|----------------------------|-------------|-------------|-----------|-------------|------------------|-------------|-------------------|----------------------------|-------------------------|
|                            | <b>CON</b>  |             | <b>OF</b> |             | <b>OF + 2'FL</b> |             |                   |                            |                         |
|                            | <b>N</b>    | <b>Mean</b> | <b>N</b>  | <b>Mean</b> | <b>N</b>         | <b>Mean</b> |                   |                            |                         |
| <i>SYP</i>                 | 12          | 0           | 12        | -0.01       | 12               | 0.26        | 0.32              | 0.772                      | XM_003135078.4          |
| <i>UBE3A</i>               | 12          | 0           | 12        | -0.64       | 12               | -0.28       | 0.29              | 0.298                      | NM_001243181.2          |

<sup>1</sup>Abbreviations: CON, control group; OF, pigs fed oligofructose; OF + 2'FL, pigs fed oligofructose and 2'fucosyllactose; SEM, standard error of the mean.

<sup>2</sup>Data analyzed via two-way ANOVA with post-hoc Tukey adjustment for multiple comparisons.

<sup>3</sup>Standardized values for mRNA expression (mean = 0, standard deviation = 1) centered by control group.

<sup>4</sup>Mean separation insignificant after Tukey adjustment.

<sup>5</sup>Number of samples below threshold: *5HTR3*, 9; *CHRM4*, 5; *CHRNA3*, 1; *CHRN2*, 1; *DRD1*, 1; *DRD2*, 3; *DRD4*, 18; *GABBR2*, 1; *GLRA4*, 9; *GRIN2C*, 2; *SLC18A2*, 8; *SLC6A2*, 15; *SLC6A3*, 14; *SLC6A4*, 4.

<sup>abc</sup>Means without a common superscript differ (P < 0.05).

**Supplemental Table 7. Continued<sup>1</sup>**

| Measure <sup>3</sup> | Diet |      |    |       |           |       | Pooled SEM | P-Value <sup>2</sup> | Accession Number |
|----------------------|------|------|----|-------|-----------|-------|------------|----------------------|------------------|
|                      | CON  |      | OF |       | OF + 2'FL |       |            |                      |                  |
|                      | N    | Mean | N  | Mean  | N         | Mean  |            |                      |                  |
| Housekeeping Genes   |      |      |    |       |           |       |            |                      |                  |
| <i>ACTB</i>          | 12   | 0    | 12 | -0.25 | 12        | 0.43  | 0.31       | 0.205                | XM_003124280.4   |
| <i>GAPDH</i>         | 12   | 0    | 12 | -0.16 | 12        | 0.22  | 0.31       | 0.664                | NM_001206359.1   |
| <i>GUS</i>           | 12   | 0    | 12 | 0.13  | 12        | -0.28 | 0.29       | 0.600                | NM_001123121.1   |
| <i>HOMER1</i>        | 11   | 0    | 12 | -0.68 | 12        | -0.71 | 0.28       | 0.149                | NM_001243811.1   |
| <i>RPL19</i>         | 12   | 0    | 12 | -0.04 | 12        | 0.47  | 0.31       | 0.335                | XM_003131509.4   |
| <i>RPS18</i>         | 12   | 0    | 12 | 0.58  | 11        | 0.64  | 0.33       | 0.124                | NM_213940.1      |
| <i>TUBB</i>          | 12   | 0    | 12 | -0.28 | 12        | -0.41 | 0.31       | 0.574                | NM_001044612.1   |

<sup>1</sup>Abbreviations: CON, control group; OF, pigs fed oligofructose; OF + 2'FL, pigs fed oligofructose and 2'fucosyllactose; SEM, standard error of the mean.

<sup>2</sup>Data analyzed via two-way ANOVA with post-hoc Tukey adjustment for multiple comparisons.

<sup>3</sup>Standardized values for mRNA expression (mean = 0, standard deviation = 1) centered by control group.

<sup>4</sup>Mean separation insignificant after Tukey adjustment.

<sup>abc</sup>Means without a common superscript differ ( $P < 0.05$ ).

**Supplemental Table 8.** Correlations between the recognition index and significant MRI and gene expression outcomes<sup>1,2</sup>

| Measure              | CON      |          | OF       |          | OF + 2'FL |          | Overall   |          |
|----------------------|----------|----------|----------|----------|-----------|----------|-----------|----------|
|                      | <i>r</i> | <i>P</i> | <i>r</i> | <i>P</i> | <i>r</i>  | <i>P</i> | $\beta_1$ | <i>P</i> |
| 1-h Delay            |          |          |          |          |           |          |           |          |
| Olfactory Bulb, %TBV | -0.76    | 0.03     | 0.14     | 0.66     | -0.34     | 0.37     | -0.21     | 0.15     |
| CHRM2                | -0.12    | 0.75     | -0.44    | 0.15     | -0.68     | 0.03     | -0.08     | 0.01     |
| DRD3                 | -0.34    | 0.37     | -0.28    | 0.39     | 0.55      | 0.10     | -0.03     | 0.45     |
| GABBR1               | -0.69    | 0.04     | -0.72    | 0.01     | -0.75     | 0.02     | -0.13     | <0.01    |
| HDAC5                | -0.78    | 0.01     | -0.29    | 0.37     | -0.65     | 0.04     | -0.11     | <0.01    |
| HDAC8                | 0.10     | 0.77     | -0.37    | 0.24     | -0.04     | 0.92     | -0.06     | 0.10     |
| NCAM1                | 0.12     | 0.76     | -0.36    | 0.24     | 0.14      | 0.69     | -0.04     | 0.31     |
| 48-h Delay           |          |          |          |          |           |          |           |          |
| Olfactory Bulb, %TBV | -0.76    | 0.03     | -0.65    | 0.03     | 0.20      | 0.61     | 0.01      | 0.94     |
| CHRM2                | 0.32     | 0.37     | 0.08     | 0.82     | 0.33      | 0.35     | 0.01      | 0.74     |
| DRD3                 | 0.26     | 0.47     | -0.01    | 0.97     | -0.18     | 0.61     | 0.04      | 0.33     |
| GABBR1               | -0.36    | 0.31     | 0.25     | 0.46     | 0.37      | 0.33     | 0.04      | 0.25     |
| HDAC5                | -0.55    | 0.10     | 0.34     | 0.31     | 0.36      | 0.30     | 0.07      | 0.10     |
| HDAC8                | 0.35     | 0.32     | -0.07    | 0.84     | 0.17      | 0.63     | 0.02      | 0.59     |
| NCAM1                | 0.15     | 0.68     | 0.08     | 0.82     | -0.32     | 0.37     | 0.01      | 0.77     |

<sup>1</sup>Abbreviations: CON, control group; OF, pigs fed oligofructose; OF + 2'FL, pigs fed oligofructose and 2'fucosyllactose; *r*, Pearson correlation coefficient; *P*, P-value;  $\beta_1$ , slope of linear regression equation; *DRD3*, dopamine receptor D3; *GABBR1*, GABA type B receptor subunit 1; *HDAC5/8*, histone deacetylases 5 and 8; *NCAM1*, neural cell adhesion molecule 1; *CHRM2*, cholinergic receptor muscarinic 2.

<sup>2</sup>Correlations were performed using only the outcomes significantly affected by diet for MRI and gene expression outcomes against the recognition index after a 1- or 48-h delay. Correlations are presented by diet group, whereas diet was not included in the linear regression model to estimate the diet independent relationship between outcomes. P-values indicate whether the Pearson correlation coefficient or slope are significantly different from zero, indicating a linear relationship between outcomes.
